# Supplementary material for: Discovery of an Experimental Model of Unicuspid Aortic Valve
Source: PubMed Central journal article supplement — J Am Heart Assoc. 2018 Jun 30;7(13):e006908. doi: 10.1161/JAHA.117.006908 (PMC6064885; doi:10.1161/jaha.117.006908), 2018-06-30
Supplement: JAH3-7-e006908-s004.pdf [file JAH3-7-e006908-s004.pdf]

# **Supplemental Material**

## Video Legends

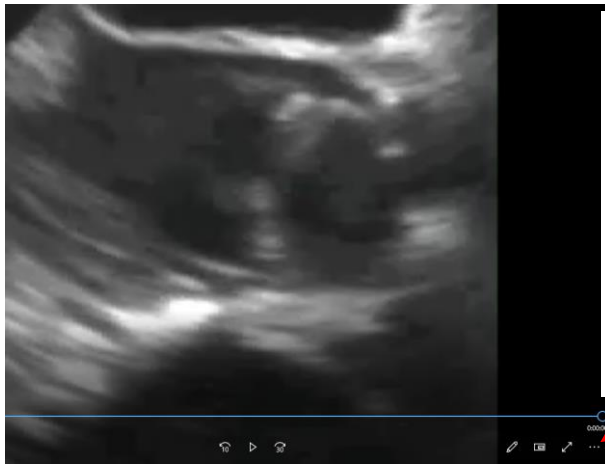

Videos are presented in .mp4 format which can be viewed using most Windows or QuickTime applications, or using open source applications designed for that purpose. To view continuous playback, click here, then select "Repeat".

**Video S1. Transesophageal echocardiogram from a 19-year-old man with unicuspid aortic valve.** For anatomical annotation, see Figure 3.

**Video S2. Echocardiogram from a Velvet mouse with unicuspid aortic valve.** For anatomical annotation, see Figure 3.

**Video S3. Transesophageal 3D echocardiogram from a 39-year-old man with unicuspid aortic valve.** For anatomical annotation, see Figure 10.
